1 **The new generation hDHODH inhibitor MEDS433 hinders the *in vitro***  
2 **replication of SARS-CoV-2**

3

4 Arianna Calistri<sup>a</sup>, Anna Lugini<sup>b</sup>, Valeria Conciatori<sup>a</sup>, Claudia Del Vecchio<sup>a</sup>, Stefano  
5 Sainas<sup>c</sup>, Donatella Boschi<sup>c</sup>, Marco Lucio Lolli<sup>c</sup>, Giorgio Gribaudo<sup>b#</sup>, Cristina Parolin<sup>a#</sup>

6

7

8 <sup>a</sup>Department of Molecular Medicine, University of Padua, 35121 Padua, Italy.

9 <sup>b</sup>Department of Life Sciences and Systems Biology, University of Turin, 10123 Turin, Italy.

10 <sup>c</sup>Department of Sciences and Drug Technology, University of Turin, 10125 Turin, Italy.

11

12

13 <sup>#</sup>Corresponding Authors: Giorgio Gribaudo ([giorgio.gribaudo@unito.it](mailto:giorgio.gribaudo@unito.it)), Cristina Parolin  
14 ([cristina.parolin@unipd.it](mailto:cristina.parolin@unipd.it))

15

16

17

18 Running title: MEDS433 inhibits SARS-CoV-2 replication

19

20

21 Word count: abstract 74; main text: 1013.

22

23

24

25

26 **Abstract**

27 Identification and development of effective drugs active against SARS-CoV-2 are  
28 urgently needed. Here, we report on the anti-SARS-CoV-2 activity of MEDS433, a novel  
29 inhibitor of human dihydroorotate dehydrogenase (hDHODH), a key cellular enzyme of the  
30 *de novo* pyrimidines biosynthesis. MEDS433 inhibits *in vitro* virus replication in the low  
31 nanomolar range, and through a mechanism that stems from its ability to block hDHODH  
32 activity. MEDS433 thus represents an attractive candidate to develop novel anti-SARS-  
33 CoV-2 agents.

34

### 35 **Main text**

36 The emergence of the novel Severe Acute Respiratory Syndrome Coronavirus 2  
37 (SARS-CoV-2), and the rapid worldwide spreading of coronavirus disease 19 (COVID-19)  
38 have produced a threat to global public health that calls for urgent deployment of effective  
39 antiviral drugs (1-4). Among the therapeutic options that have been potentially considered,  
40 small-molecules targeting host factors exploited by SARS-CoV-2 to replicate may  
41 represent an alternative to direct acting agents prone to select drug resistant strains (5).  
42 One of the cellular pathways that is attracting more attention for the advancement of host-  
43 targeting antivirals (HTA), is the *de novo* pyrimidines biosynthesis, essential for virus  
44 replication in infected cells (6). In this pathway, the human dihydroorotate dehydrogenase  
45 (hDHODH) catalyzes the rate-limiting step of dehydrogenation of dihydroorotate to orotate,  
46 thus providing uridine and cytidine to fulfill nucleotides request (7-9). Given its critical role,  
47 hDHODH is considered an emerging target of choice for the development of HTA against  
48 SARS-CoV-2 (10). In this regard, two potent hDHODH inhibitors just entered in Phase II  
49 clinical trials for COVID-19: brequinar (11) (NCT04425252), and PTC299 (12)  
50 (NCT04439071). However, these drug candidates suffer of toxicity issues that slowed  
51 down their earlier clinical pathway on other therapeutic applications (13, 14). Thus, new  
52 safest hDHODH inhibitors are urgently needed.

53 To investigate the feasibility of targeting hDHODH to develop HTA against SARS-CoV-  
54 2, in this study we have characterized the *in vitro* antiviral activity of a new generation  
55 hDHODH inhibitor produced by the rational modulation to brequinar (11), and  
56 characterized by the presence of a 2-hydroxypyrazolo[1,5-a]pyridine moiety. This  
57 compound, MEDS433 (Fig. 1A), is comparable to brequinar in inhibiting hDHODH activity,  
58 while owing a better *drug-like* profile (15, 16).

59 The effect of MEDS433 on SARS-CoV-2 replication was evaluated in Vero E6 cells  
60 infected with a clinical isolate of SARS-CoV-2 (2019-nCoV/Italy-INMI1) at a multiplicity of  
61 infection (MOI) of 0.1, and then treated with 0.5  $\mu$ M MEDS433. At 24 hours post-infection  
62 (h p.i.), cells were fixed, permeabilized and stained with an anti-SARS-CoV-2 nucleocapsid  
63 N protein mAb, and with DRAQ5 which stains cell nuclei, to count cell numbers. As shown  
64 in Fig. 1B, confocal microscopy revealed that while about 85% of infected control cells  
65 expressed the N protein, MEDS433 treatment completely abolished its accumulation, thus  
66 indicating that N protein expression could be prevented by targeting the *de novo*  
67 pyrimidine biosynthesis.

68 Next, a virus yield reduction assays (VRA) was performed in SARS-CoV-2-infected  
69 Vero E6 cells treated with increasing concentrations of MEDS433. At 48 h p.i., cell  
70 supernatants were harvested and titrated by plaque assay. A concentration-dependent  
71 inhibition of SARS-CoV-2 replication was thus observed (Fig.1C), with  $EC_{50}$  and  $EC_{90}$   
72 values of 0.063 and 0.136  $\mu$ M, respectively. Interestingly, MEDS433 was more effective  
73 than brequinar ( $EC_{50}$  0.20,  $EC_{90}$  1 $\mu$ M) (Fig. 1C). In addition, the Cytotoxic Concentration  
74 ( $CC_{50}$ ) of MEDS433 as measured in uninfected Vero E6 cells by the MTT method (17),  
75 was more than 500  $\mu$ M with a favorable Selective Index (SI) greater than 7,900, thus  
76 indicating that its antiviral activity was not due to a reduced cell viability.

77 To get more insights into MEDS433 mechanism of action, time-of-addition  
78 experiments were carried out. Briefly, Vero E6 cells were exposed to MEDS433 (0.5  $\mu$ M)

79 from -2 to -1 h prior to SARS-CoV-2 adsorption (MOI of 0.1) (pre-treatment); during  
80 infection (adsorption stage, from -1 to 0 h) (co-treatment); or after viral adsorption (from 0  
81 to 48 h p.i.) (post-treatment). Infectious SARS-CoV-2 particles were then quantified in cell  
82 supernatants harvested at 48 h p.i. by plaque assay. As depicted in Fig. 2A, MEDS433 did  
83 not affect the initial attachment and entry phases of the SARS-CoV-2 life cycle, while it  
84 produced a significant reduction of infectious virus production when added at a post-entry  
85 stage, in agreement with its ability to block N protein accumulation (Fig. 1B). Immunoblot  
86 analysis of total protein extracts prepared from the corresponding SARS-CoV-2-infected-  
87 and MEDS433-treated cells and fractionated through a 10% SDS-PAGE, confirmed a  
88 reduction of N protein content only in the post-treatment sample (Fig. 2B), thus indicating  
89 that MEDS433 interferes with a post-entry biosynthetic step in SARS-CoV-2 replication.

90         These results suggested a mechanism of the anti-SARS-CoV-2 activity of  
91 MEDS433 consistent with the hypothesis of an interference with the *de novo* pyrimidine  
92 biosynthesis. To verify this hypothesis, we investigated by plaque reduction assays (PRA)  
93 in Vero E6 cells whether the antiviral activity of MEDS433 could be overcome by  
94 supplementing cell medium with increasing concentrations of exogenous uridine to bypass  
95 the requirement of *de novo* pyrimidine biosynthesis. As shown in Fig. 3 (upper panel), the  
96 anti-SARS-CoV-2 activity of 0.3  $\mu$ M MEDS443 was significantly reversed by a 100-fold  
97 excess of uridine relative to MEDS433 concentration, and completely overturned by  
98 greater uridine concentrations, thus confirming that the *de novo* pyrimidine pathway was  
99 inhibited by MEDS433 in SARS-CoV-2-infected cells. Then, to conclusively prove that  
100 hDHODH inhibition was responsible of MEDS433 antiviral effect, increasing  
101 concentrations of the hDHODH substrate dihydroorotic acid or its product, orotic acid were  
102 added to cell medium. In SARS-CoV-2-infected Vero E6 cells treated with MEDS433 (0.3  
103  $\mu$ M), the addition of orotic acid reversed in a dose dependent manner the antiviral effect of  
104 MEDS433 (Fig. 3, lower panel), with complete reversion observed at the highest

105 concentration (1000 x the MEDS433 concentration) evaluated. In contrast, the supplement  
106 of dihydroorotic acid, even at 1 mM (3,333 times more than MEDS433), did not affect  
107 MEDS433 antiviral activity (Fig. 3, lower panel), thus indicating that MEDS433 inhibited a  
108 step in the *de novo* pyrimidine biosynthesis pathway downstream from dihydroorotic acid.  
109 Altogether, these results clearly confirmed that MEDS433 specifically targets hDHODH  
110 activity in SARS-CoV-2-infected cells, and that this inhibition is responsible of its overall  
111 antiviral activity.

112 In conclusion, our study while confirming along with others recent reports (12,18)  
113 hDHODH as a noteworthy target to inhibit SARS-CoV-2 infection (10,19), highlights  
114 MEDS433 as an attractive candidate to develop HTA for COVID-19. MEDS433 in fact  
115 performs better than brequinar for both antiviral potency and SI (this study and 16), and its  
116 safety profile is superior to that of PTC299 (12). Therefore, the potent *in vitro* anti-SARS-  
117 CoV-2 activity of MEDS433 and its valuable *drug-like* profile, support further studies to  
118 validate its therapeutic efficacy in preclinical animal models of COVID-19.

119

## 120 **Acknowledgments**

121 This work was supported by Italian Ministry for Universities and Scientific Research  
122 (Research Programs of Significant National Interest, PRIN 2017–2020, Grant No.  
123 2017HWPZZZ\_002) to A.L.; Ministero degli Affari Esteri e della Cooperazione  
124 Internazionale (Grant number PGR01071 Italia/Svezia (MIUR/MAECI)) to D.B. and M.L.L.;  
125 Associazione Italiana per la Ricerca sul Cancro (AIRC) Individual Grant 2019 (AIRC IG  
126 2019 DIORAMA 23344) to D.B. and M.L.L.; the University of Torino (Ricerca Locale) to  
127 D.B., G.G., M.L.L. and A.L.; the University of Padua (DOR) to A.C. and C.P.;  
128 PARO\_FINA20\_01 to C.P.; and BIRD grant CALI\_SID19\_08 to A.C. This study was also  
129 supported by the European Virus Archive goes Global (EVAg) project that has received

130 funding from the European Union's Horizon 2020 research and innovation programme  
131 under grant agreement No 653316.

132

### 133 **References**

- 134 1. Salata C, Calistri A, Parolin C, Palù G. 2019. Coronaviruses: a paradigm of new  
135 emerging zoonotic diseases. *Pathog Dis* 77:ftaa006.
- 136 2. Zhu N, Zhang D, Wang W, Li X, Yang B, Song J, Zhao X, Huang B, Shi W, Lu R, Niu  
137 P, Zhan F, Ma X, Wang D, Xu W, Wu G, Gao GF, Tan W, for the China Novel  
138 Coronavirus Investigating and Research Team. 2020. A novel coronavirus from  
139 patients with pneumonia in China. *N Engl J Med* 382:727-733.
- 140 3. Hu B, Guo H, Zhou P, Shi Z-L. 2020. Characteristics of SARS-CoV-2 and COVID-19.  
141 *Nat Rev Microbiol* 2020 Oct 6; 1-14 doi:10.1038/s41579-020-00459-7.
- 142 4. <https://covid19.who.int>.
- 143 5. Li G, De Clercq E. 2020. Therapeutic options for the 2019 novel coronavirus (2019-  
144 nCoV). *Nat Rev Drug Discov* 19:149-150.
- 145 6. Okesli A, Khosla C, Bassik MC. 2017. Human pyrimidine nucleotide biosynthesis as a  
146 target for antiviral chemotherapy. *Curr Op Biotech* 48:127-134.
- 147 7. Reis RAG, Calil FA, Feliciano PR, Pinheiro MP, Nonato MC. 2017. The dihydroorotate  
148 dehydrogenases: past and present. *Arch Biochem Biophys* 632:175-191.
- 149 8. Loeffler M, Carrey EA, Knecht W. 2020. The pathway to pyrimidines: the essential  
150 focus on dihydroorotate dehydrogenase, the mitochondrial enzyme coupled to the  
151 respiratory chain. *Nucleosides Nucleotides Nucleic Acids* 11:1-25.
- 152 9. Boschi D, Pippione AC, Sainas S, Lolli ML. 2019. Dihydroorotate dehydrogenase  
153 inhibitors in anti-infective drug research. *Eur J Med Chem* 183:111681.
- 154 10. Coehlo AR, Oliveira PJ. 2020. Dihydroorotate dehydrogenase inhibitors in SARS-CoV-  
155 2 infection. *Eur J Clin Invest* 50:e13366.

- 156 11. Peters GJ. 2018. Re-evaluation of Brequinar sodium, a dihydroorotate dehydrogenase  
157 inhibitor. *Nucleosides Nucleotides Nucleic Acids* 37:666-678.
- 158 12. Luban J, Sattler R, Mühlberger E, Graci JD, Cao L, Weetall M, Trotta C, Colacino JM,  
159 Bavari S, Strambio-De-Castillia C, Suder EL, Wang Y, Soloveva V, Cintron-Lue K,  
160 Naryshkin NA, Pykett M, Welch EM, O'Keefe K, Kong R, Goodwin E, Jacobson A,  
161 Paessler S, Peltz S. 2020. The DHODH inhibitor PTC299 arrests SARS-CoV-2  
162 replication and suppresses induction of inflammatory cytokines. *Virus Res* 2020 Nov.  
163 26, 198246, doi:10.1016/j.virusres.2020.198246.
- 164 13. Natale R, Wheeler R, Moore M, Dallaire B, Lynch W, Carlson R, Grillo-Lopez A,  
165 Gyves L. 1992. Multicenter phase II trial of brequinar sodium in patients with advanced  
166 melanoma. *Ann Oncol* 3:659-660.
- 167 14. Emvododstat - PTC Therapeutics. *AdisInsight Drugs* [Released 2006 May 17; Updated  
168 2020 Aug. 11], <https://adisinsight.springer.com/drugs/800024409>
- 169 15. Sainas S, Pippione AC, Lupino E, Giorgis M, Circosta P, Gaidano V, Goyal P, Bonanni  
170 D, Rolando B, Cignetti A, Ducime A, Andersson M, Järvå M, Friemann R, Piccinini M,  
171 Ramondetti C, Buccinnà B, Al-Karadaghi S, Boschi D, Saglio G, Lolli ML. 2018.  
172 Targeting myeloid differentiation using potent 2-Hydroxypyrazolo [1,5- a] pyridine  
173 scaffold-based human dihydroorotate dehydrogenase inhibitors. *J Med Chem*  
174 61:6034-6055.
- 175 16. Sainas S, Giorgis M, Circosta P, Gaidano V, Bonanni D, Pippione AC, Bagnati R,  
176 Passoni A, Qiu Y, Cojocaruf CF, Canepa B, Bona A, Rolando B, Mishina M,  
177 Ramondetti R, Buccinnà B, Piccinini M, Houshmand M, Cignetti A, Giraudo E, Al-  
178 Karadaghi S, Boschi B, Saglio G, Lolli ML. 2020. Targeting acute myelogenous  
179 leukemia using potent human dihydroorotate dehydrogenase inhibitors based on the  
180 2-hydroxypyrazolo[1,5-a]pyridine scaffold: SAR of the biphenyl moiety. *J Med Chem*,  
181 in press.

- 182 17. Mosmann T. 1983. Rapid colorimetric assay for cellular growth and survival:  
183 application to proliferation and cytotoxicity assays. *J Immunol Methods* 65:55-63.
- 184 18. Xiong R, Zhang L, Li S, Sun Y, Ding M, Wang Y, Zhao Y, Wu Y, Shang W, Jiang X,  
185 Shan J, Shen Z, Tong Y, Xu L, Chen Y, Liu Y, Zou G, Lavillete D, Zhao Z, Wang R,  
186 Zhu L, Xiao G, Lan K, Li H, Xu K. 2020. Novel and potent inhibitors targeting DHODH  
187 are broad-spectrum antivirals against RNA viruses including newly-emerged  
188 coronavirus SARS-CoV-2. *Protein Cell* 11:723-739.
- 189 19. Xu Y, Jiang H. 2020. Potential treatment of COVID-19 by inhibitors of human  
190 dihydroorotate dehydrogenase. *Protein Cell* 11:699-702.

191

## 192 **Figure Legends**

193 **Figure 1. Antiviral activity of MEDS433 on SARS-CoV-2 replication. (A)** Structure of  
194 MEDS433. **(B)** Immunofluorescence analysis of SARS-CoV-2-infected cells. Vero E6 cells  
195 were treated with vehicle (DMSO) or with 0.5  $\mu$ M MEDS433 1 h prior to infection with  
196 SARS-CoV-2 at an MOI of 0.1. At 24 h p.i., cells were fixed, permeabilized, and  
197 immunostained with an anti-SARS-CoV-2 nucleocapsid protein (N) mAb, followed by Alexa  
198 488-conjugated secondary antibody. Nuclei were stained with DRAQ5. Confocal laser  
199 microscopy images acquired in the green (SARS-CoV-2 N) and the blue (DRAQ5)  
200 channels are shown, as well as overlaid images (merge). **(C)** Dose dependent inhibition of  
201 SARS-CoV-2 replication by MEDS433. Vero E6 cell monolayers were infected with SARS-  
202 CoV-2 (50 PFU/well), and, where indicated, the cells were treated with vehicle (DMSO) or  
203 increasing concentrations of MEDS433 or brequinar 1 h before, during virus adsorption,  
204 and throughout the experiment. At 48 h p.i., infectious SARS-CoV-2 in cell supernatants  
205 was titrated by plaque assay on Vero E6 cells. MEDS433 and brequinar concentrations  
206 producing 50 and 90% reductions in plaque formation ( $EC_{50}$  and  $EC_{90}$ , respectively) were



207 determined as compared to control treatment (DMSO). The data shown represent means  
208  $\pm$  SD (error bars) of three independent experiments performed in triplicate.

209 **Figure 2. MEDS433 targets a post-entry stage in the SARS-CoV-2 replicative cycle.**

210 **(A)** Time-of-addition experiment. Vero E6 cells were incubated with vehicle (DMSO) or  
211 with 0.5  $\mu$ M MEDS433 from 2 to -1 h prior to SARS-CoV-2 infection (MOI of 0.1) (pre-  
212 treatment, Pre-T); during infection (from -1 to 0 h) (co-treatment, Co-T); or after viral  
213 infection (from 0 to 48 h p.i.) (post-treatment, Post-T). Thereafter, production of infectious  
214 SARS-CoV-2 was measured by titrating cell supernatants by plaque assay on Vero E6  
215 cells. The data shown represent means  $\pm$  SD (error bars) of three independent  
216 experiments performed in triplicate. Statistical significance was calculated by a one-way  
217 ANOVA followed by Dunnett's multiple comparison test. \*\*\* ( $p < 0.0001$ ) compared to the  
218 calibrator sample (MEDS433 alone).

219 **(B)** Immunoblot analysis of SARS-CoV-2 nucleocapsid protein. Total protein extracts  
220 prepared from SARS-CoV-2-infected Vero E6 cells monolayers treated as described in  
221 (A), were fractionated through a 10% SDS-PAGE, and immunoblotted with an anti-N  
222 protein mAb. Tubulin was immunodetected as protein loading control.

223 **Figure 3. Uridine or orotic acid supplementation counteracts the anti-SARS-CoV2**

224 **activity of MEDS433.** Vero E6 cell were treated with solvent (DMSO) or 0.3  $\mu$ M of  
225 MEDS433 in the absence or presence of increasing concentrations of uridine (upper  
226 panel), orotic acid or dihydroorotic acid (lower panel) before and during infection with  
227 SARS-CoV-2 (30 PFU/well). Following virus adsorption, compounds were added to cell  
228 monolayers and viral plaques were then stained and were microscopically counted at 48 h  
229 p.i.. Plaque counts for each drug concentration were expressed as a percent of the mean  
230 count of the control cultures treated with DMSO. The data shown represent means  $\pm$  SD of  
231 three independent experiments performed in triplicate. Statistical significance was  
232 calculated by a one-way ANOVA followed by Dunnett's multiple comparison test. \*\* ( $p <$

233 0.0001), \*\* ( $p < 0.001$ ) and \* ( $p < 0.05$ ) compared to the calibrator sample (MEDS433  
234 alone).

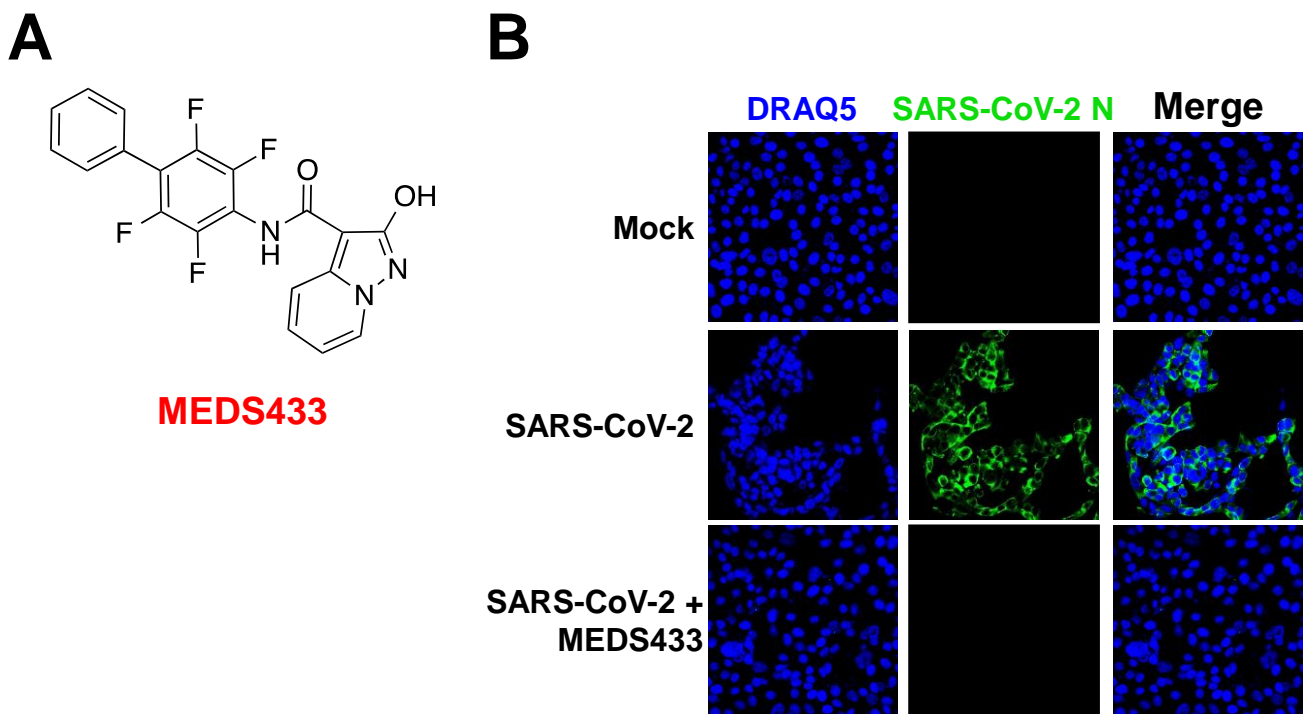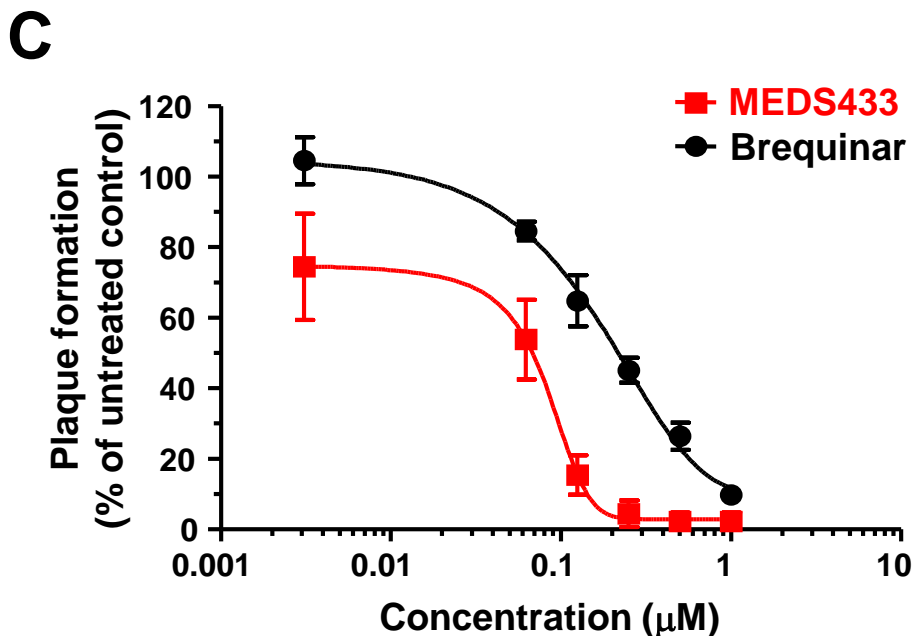

**Figure 1. Antiviral activity of MEDS433 on SARS-CoV-2 replication. (A)** Structure of MEDS433. **(B)** Immunofluorescence analysis of SARS-CoV-2-infected cells. Vero E6 cells were treated with vehicle (DMSO) or with 0.5  $\mu\text{M}$  MEDS433 1 h prior to infection with SARS-CoV-2 at an MOI of 0.1. At 24 h p.i., cells were fixed, permeabilized, and immunostained with an anti-SARS-CoV-2 nucleocapsid protein (N) mAb, followed by Alexa 488-conjugated secondary antibody. Nuclei were stained with DRAQ5. Confocal laser microscopy images acquired in the green (SARS-CoV-2 N) and the blue (DRAQ5) channels are shown, as well as overlaid images (merge). **(C)** Dose dependent inhibition of SARS-CoV-2 replication by MEDS433. Vero E6 cell monolayers were infected with SARS-CoV-2 (50 PFU/well), and, where indicated, the cells were treated with vehicle (DMSO) or increasing concentrations of MEDS433 or brequinar 1 h before, during virus adsorption, and throughout the experiment. At 48 h p.i., infectious SARS-CoV-2 in cell supernatants was titrated by plaque assay on Vero E6 cells. MEDS433 and brequinar concentrations producing 50 and 90% reductions in plaque formation ( $\text{EC}_{50}$  and  $\text{EC}_{90}$ , respectively) were determined as compared to control treatment (DMSO). The data shown represent means  $\pm$  SD (error bars) of three independent experiments performed in triplicate.

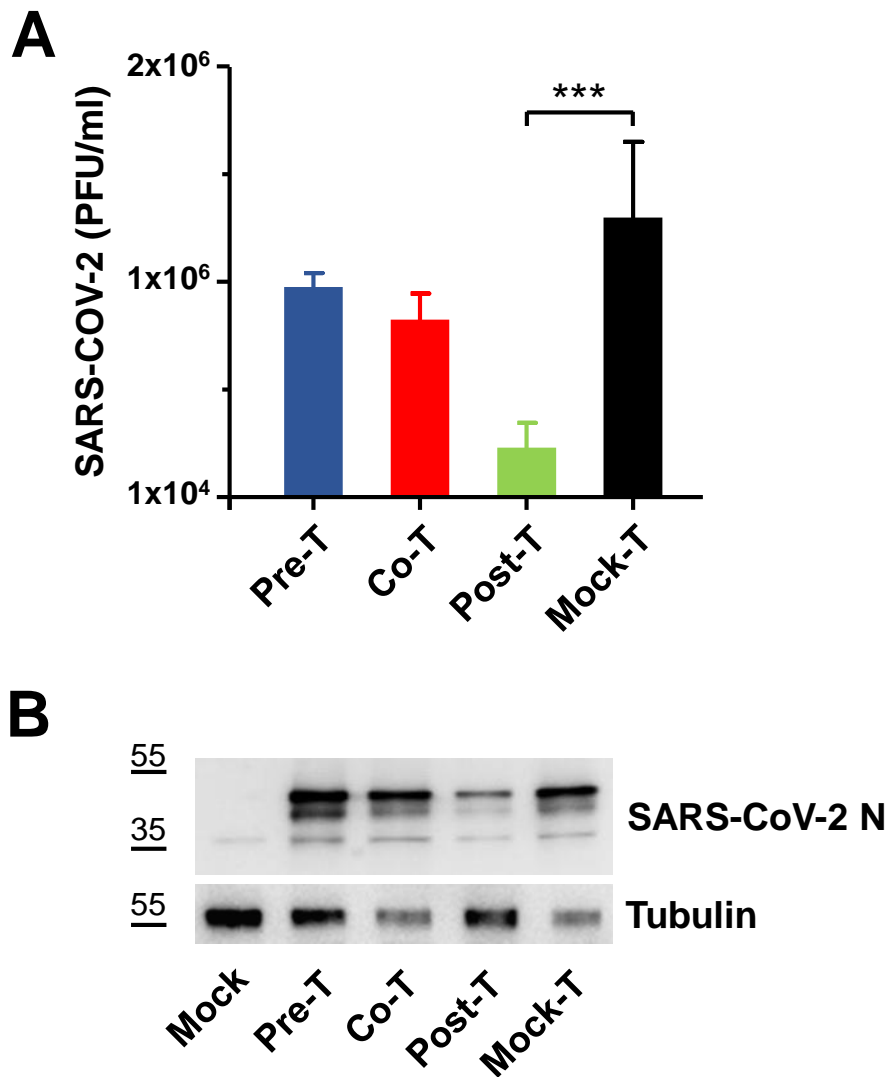

**Figure 2. MEDS433 targets a post-entry stage in the SARS-CoV-2 replicative cycle. (A)** Time-of-addition experiment. Vero E6 cells were incubated with vehicle (DMSO) or with 0.5  $\mu$ M MEDS433 from 2 to - 1h prior to SARS-CoV-2 infection (MOI of 0.1) (pre-treatment, Pre-T); during infection (from -1 to 0 h) (co-treatment, Co-T); or after viral infection (from 0 to 48 h p.i.) (post-treatment, Post-T). Thereafter, production of infectious SARS-CoV-2 was measured by titrating cell supernatants by plaque assay on Vero E6 cells. The data shown represent means  $\pm$  SD (error bars) of three independent experiments performed in triplicate. Statistical significance was calculated by a one-way ANOVA followed by Dunnett's multiple comparison test. \*\*\* ( $p < 0.0001$ ) compared to the calibrator sample (MEDS433 alone).

**(B)** Immunoblot analysis of SARS-CoV-2 nucleocapsid protein. Total protein extracts prepared from SARS-CoV-2-infected Vero E6 cells monolayers treated as described in (A), were fractionated through a 10% SDS-PAGE, and immunoblotted with an anti-N protein mAb. Tubulin was immunodetected as protein loading control.

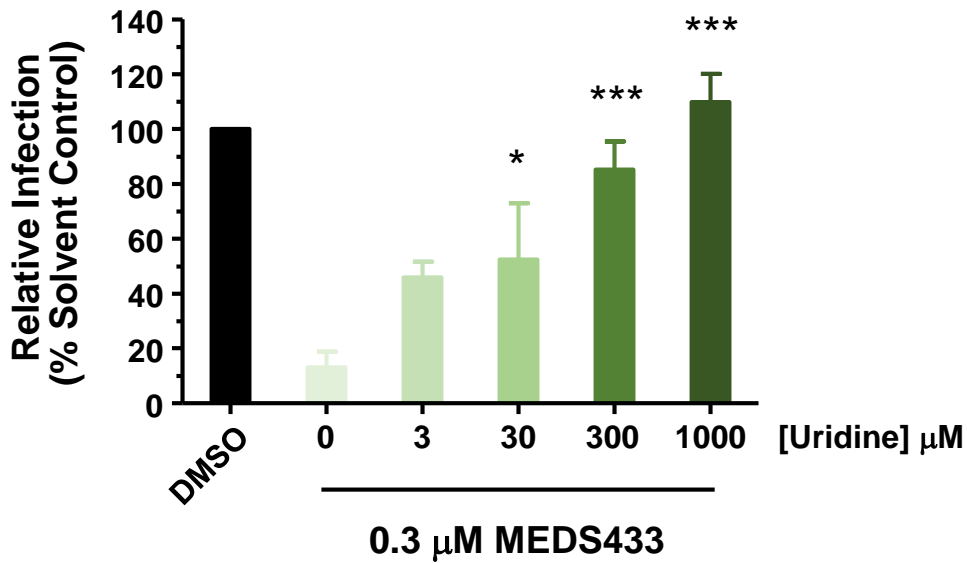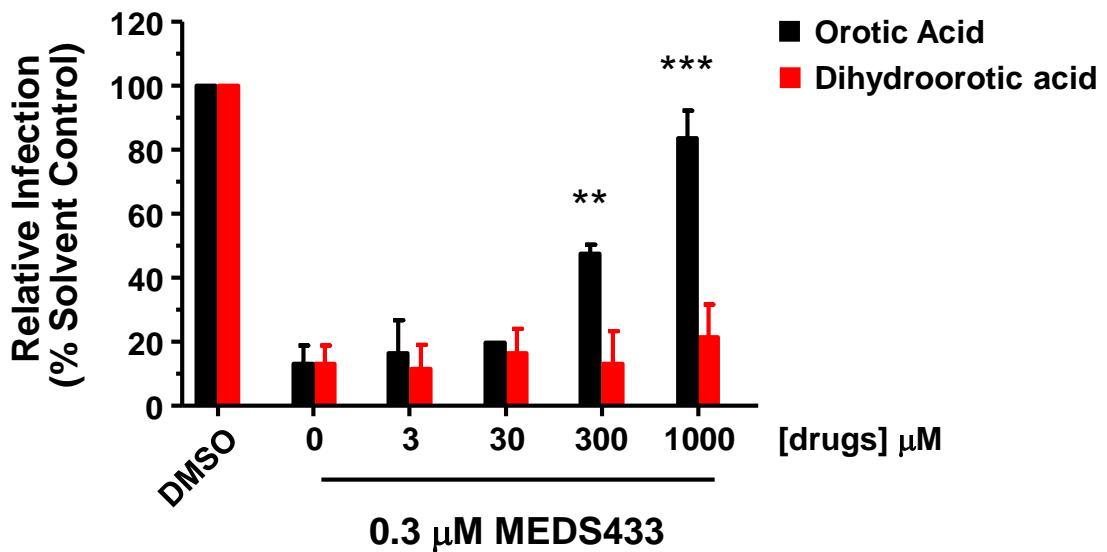

**Figure 3. Uridine or orotic acid supplementation counteracts the anti-SARS-CoV2 activity of MEDS433.** Vero E6 cell were treated with solvent (DMSO) or 0.3  $\mu\text{M}$  of MEDS433 in the absence or presence of increasing concentrations of uridine (upper panel), orotic acid or dihydroorotic acid (lower panel) before and during infection with SARS-CoV-2 (30 PFU/well). Following virus adsorption, compounds were added to cell monolayers and viral plaques were then stained and were microscopically counted at 48 h p.i.. Plaque counts for each drug concentration were expressed as a percent of the mean count of the control cultures treated with DMSO. The data shown represent means  $\pm$  SD of three independent experiments performed in triplicate. Statistical significance was calculated by a one-way ANOVA followed by Dunnett's multiple comparison test. \*\* ( $p < 0.0001$ ), \*\*\* ( $p < 0.001$ ) and \* ( $p < 0.05$ ) compared to the calibrator sample (MEDS433 alone).
